# Supplementary material
Source: Springer Nature journal article supplement (https://www.springermedizin.de/resource/supplementary/12992_2013_279_MOESM2_ESM.pdf/9616266)
Supplement: MOESM2 [file 9616266]

CHMI database

Program search under Legal status: "For-profit" and "Private Sector, non-specified" returned 95 results

Excluded 67 initiatives  
Criteria: not for-profit, non service delivery, not pro-poor, incomplete or lack of information

Of 28 remaining, excluded 18.  
Criteria: scale (serving less than 40,000 people a year)

10 remaining  
(includes one with unclear legal status non-profit)

Initiatives described in reviews and other publications

26 different initiatives mentioned in other resources and reviews

Excluded all initiatives  
Criteria: not-for-profit, social franchises, lack of information (no website, just interview sources), scale.

0 initiatives remaining
